# Supplementary material for: N-mixture model-based estimate of relative abundance of sloth bear (Melursus ursinus) in response to biotic and abiotic factors in a human-dominated landscape of central India
Source: PeerJ journal article supplement (doi:10.7717/peerj.13649), 2022-12-06

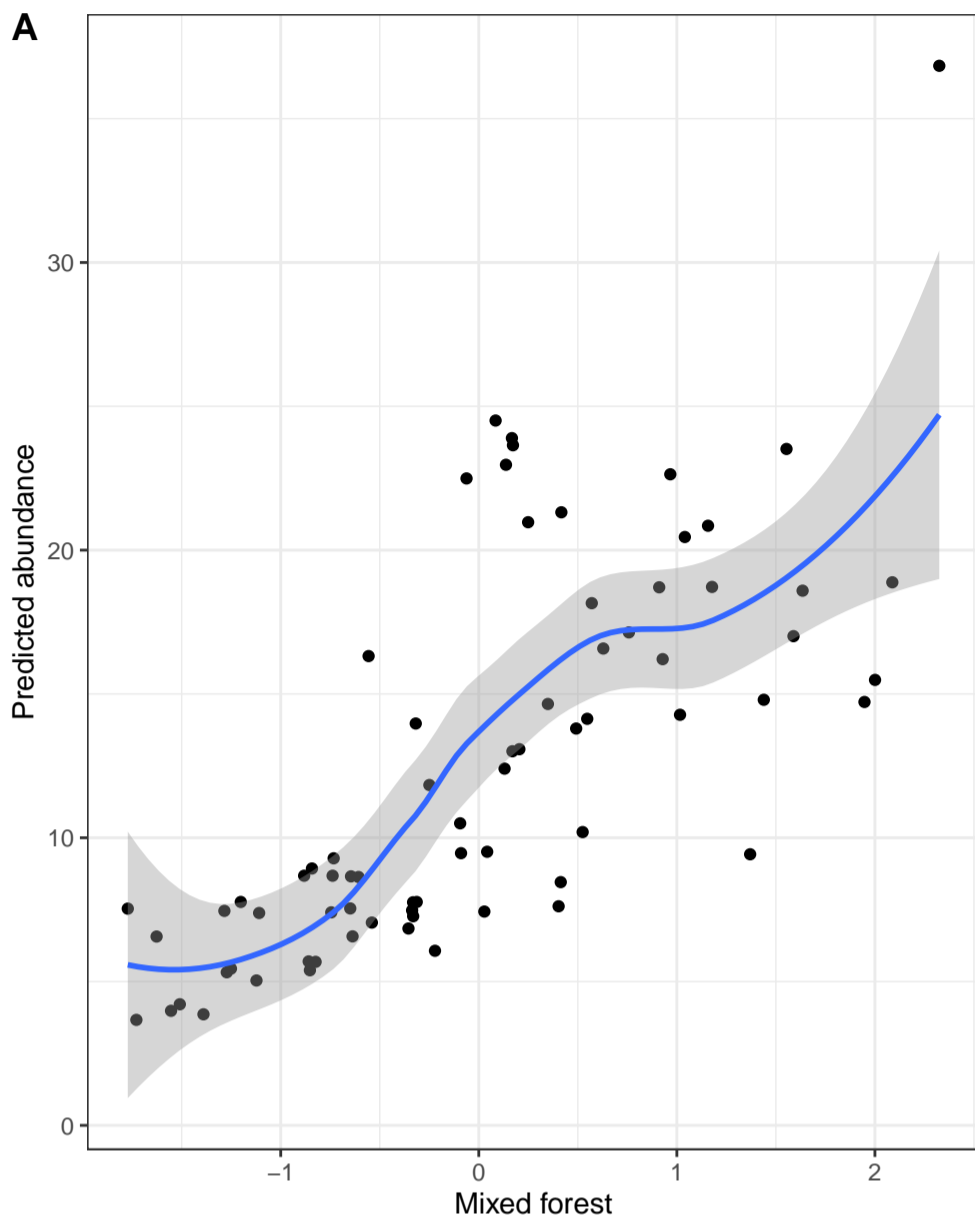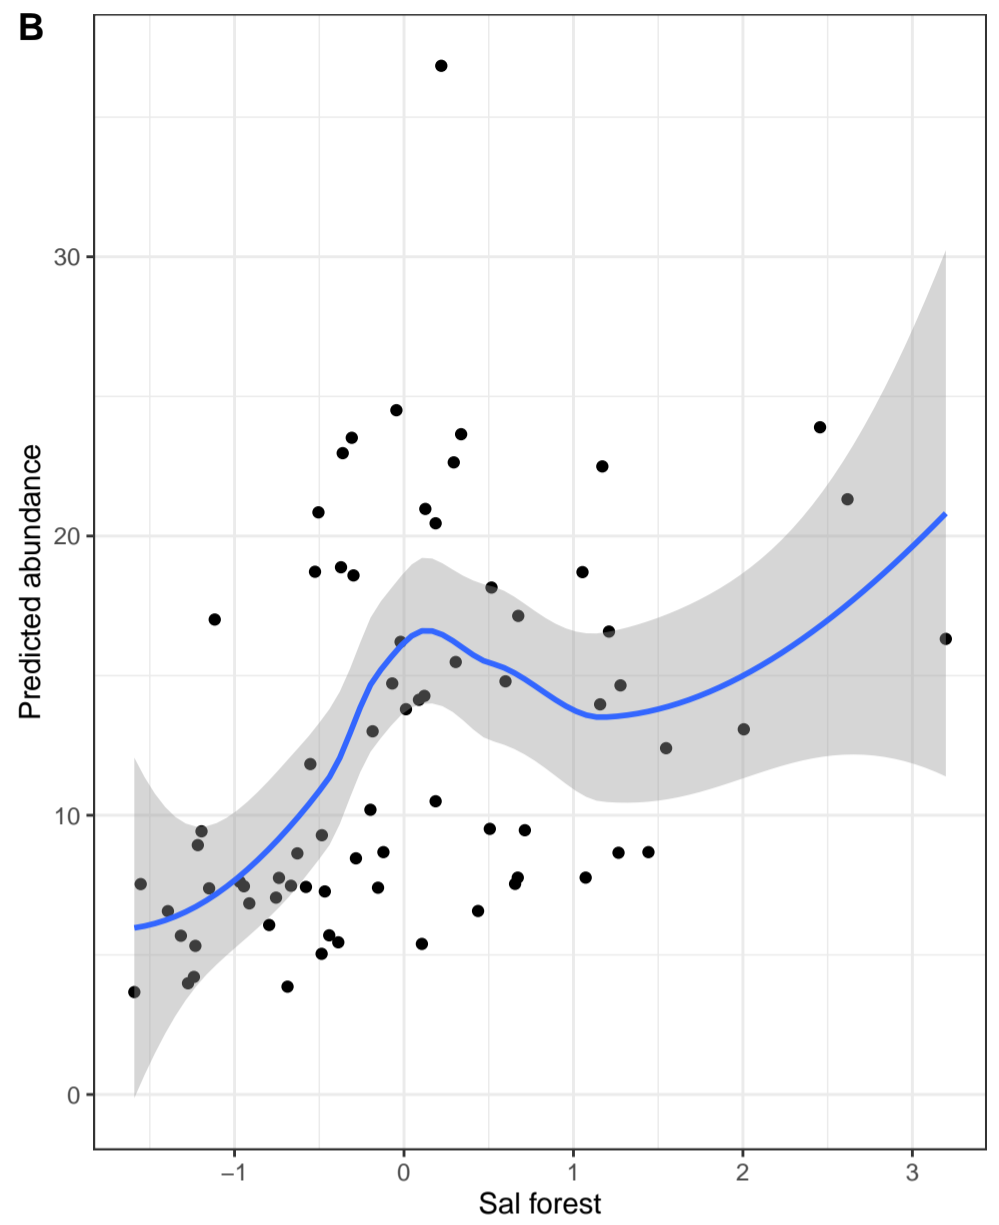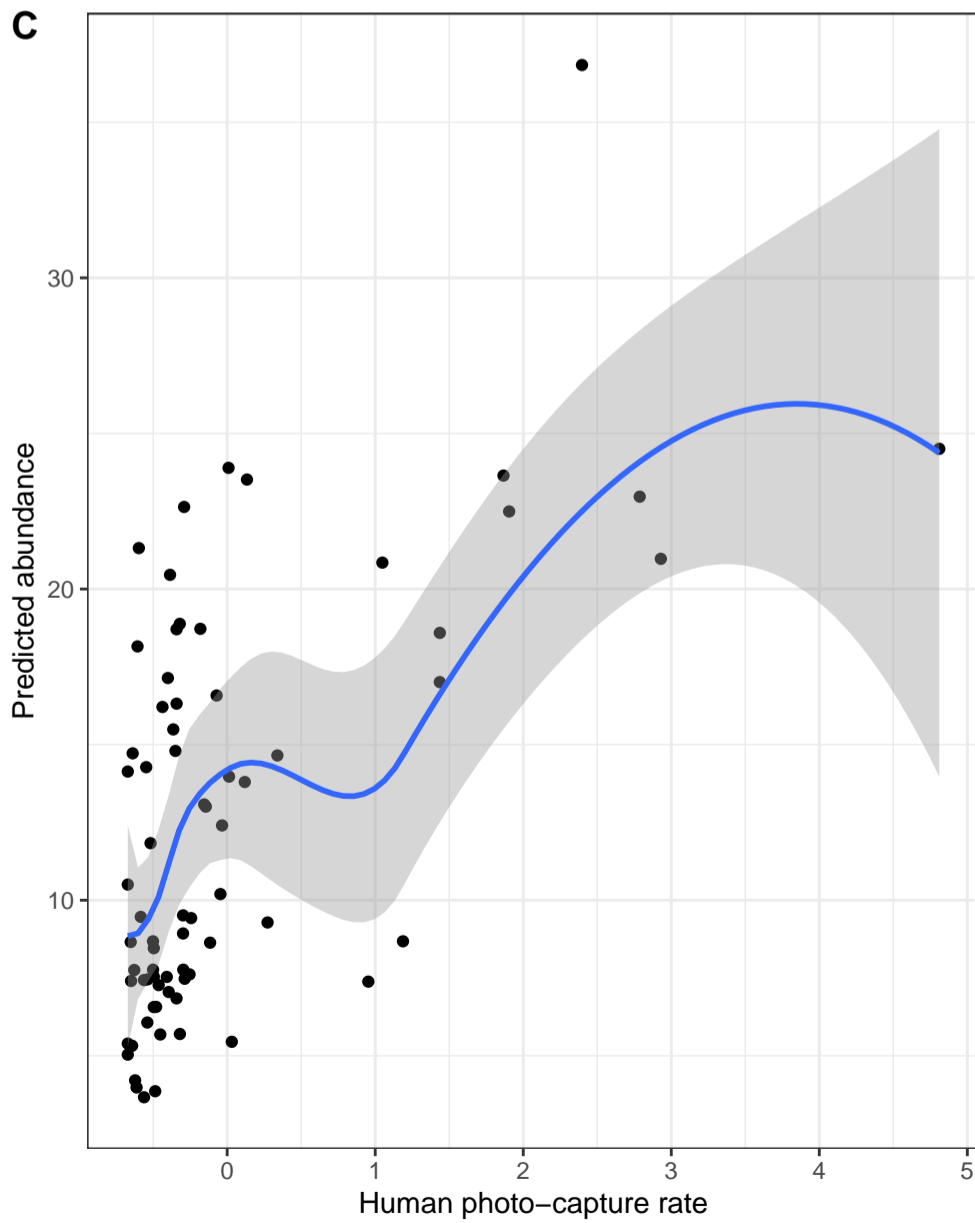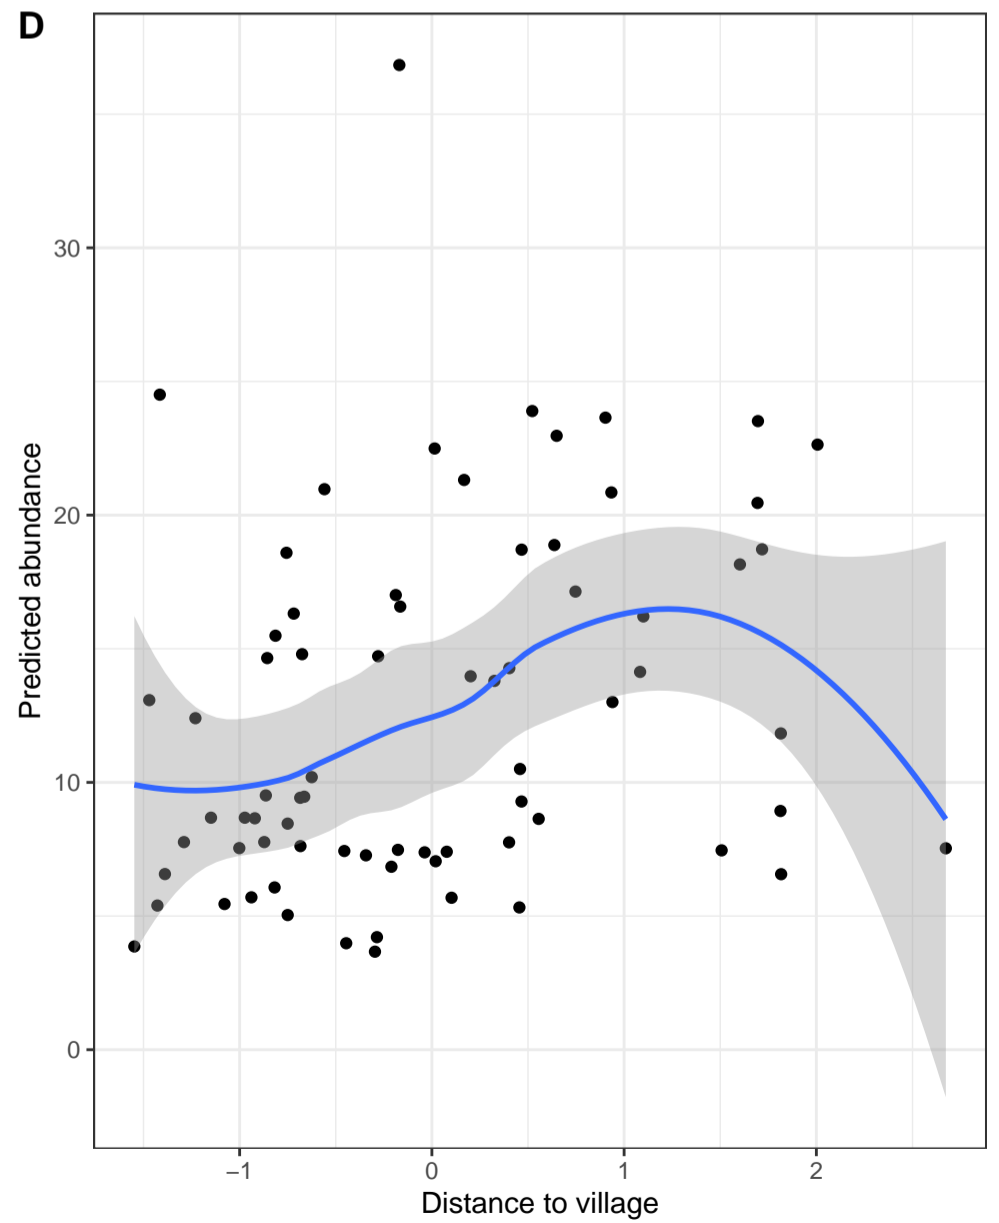

Supplement: Supplemental_Figure_S3.pdf [file Supplemental_Figure_S3.pdf]
